# Supplementary material for: Inversion of long-lived trace gas emissions using combined Eulerian and Lagrangian chemical transport models
Source: Copernicus journal article supplement (doi:10.5194/acp-11-9887-2011), 2011-09-26
Supplement: Supplementary file 2 [file acp-11-9887-2011-supplement.zip]

Archive with 6 entries (5 files):
- aux_mat_aggregated_country_info.pdf
- aux_mat_aggregated_regions.pdf
- aux_mat_pdf.pdf
- README.txt
- __MACOSX/
- __MACOSX/._README.txt
