# Supplementary material for: Inversion of long-lived trace gas emissions using combined Eulerian and Lagrangian chemical transport models
Source: Copernicus journal article supplement (doi:10.5194/acp-11-9887-2011), 2011-09-26
Supplement: Supplementary file 2 [file acp-11-9887-2011-supplement.zip › aux_mat_aggregated_country_info.pdf]

**INVERSION OF LONG-LIVED TRACE GAS EMISSIONS USING  
COMBINED EULERIAN AND LAGRANGIAN CHEMICAL  
TRANSPORT MODELS, SUPPLEMENTARY MATERIAL: NATIONAL  
EMISSIONS TOTALS**

M. RIGBY, A.J. MANNING AND R.G. PRINN

TABLE S 1. Emissions from countries close to AGAGE monitoring sites. The second column shows the fraction of national emissions residing within local regions (according to the EDGAR database). The next three columns show the posterior emissions (mean, 16<sup>th</sup> and 84<sup>th</sup> percentiles). The final two columns show the range of mean emissions obtained in the sensitivity tests. All emissions refer to the fraction of emissions residing within the ‘local’ domains.

| Country        | Local fraction (%) | Emissions 2007 - 2009 (Gg/yr) |                 |                 |            |            |
|----------------|--------------------|-------------------------------|-----------------|-----------------|------------|------------|
|                |                    | Q                             | Q <sub>16</sub> | Q <sub>84</sub> | Range min. | Range max. |
| AUSTRALIA      | 64                 | 9                             | 3               | 17              | 4          | 19         |
| AUSTRIA        | 100                | 14                            | 6               | 23              | 7          | 16         |
| BELGIUM        | 100                | 10                            | 3               | 17              | 9          | 10         |
| CANADA         | 14                 | 23                            | 13              | 34              | 11         | 27         |
| CHINA          | 75                 | 1787                          | 1636            | 1938            | 1400       | 2149       |
| FRANCE         | 100                | 127                           | 85              | 167             | 78         | 126        |
| GERMANY        | 100                | 461                           | 380             | 541             | 264        | 648        |
| ITALY          | 80                 | 26                            | 10              | 41              | 14         | 29         |
| JAPAN          | 99                 | 221                           | 154             | 287             | 190        | 1256       |
| NETHERLANDS    | 100                | 9                             | 3               | 17              | 7          | 10         |
| NORWAY         | 88                 | 10                            | 3               | 17              | 6          | 11         |
| SOUTH KOREA    | 100                | 936                           | 856             | 1013            | 609        | 978        |
| SWITZERLAND    | 100                | 16                            | 6               | 27              | 13         | 16         |
| TAIWAN         | 100                | 236                           | 154             | 321             | 117        | 365        |
| UNITED KINGDOM | 100                | 19                            | 10              | 27              | 18         | 31         |
| UNITED STATES  | 19                 | 296                           | 219             | 376             | 125        | 371        |
