# Supplementary material for: Inversion of long-lived trace gas emissions using combined Eulerian and Lagrangian chemical transport models
Source: Copernicus journal article supplement (doi:10.5194/acp-11-9887-2011), 2011-09-26
Supplement: Supplementary file 2 [file acp-11-9887-2011-supplement.zip › README.txt]

The file aux_mat_aggregated_regions.pdf contains a discussion of the method used to aggregate 'local' emissions regions.  Figure S1 is in this file.
The file aux_mat_pfd.pdf presents the probability distribution of the local emissions sub-regions.  Figure S2 is in this file.
The file aux_mat_aggregated_country_info.pdf is a table of national emissions within the local domains. Table S1 is in this file.
